# Supplementary material for: Structural Probing with MNase Tethered to Ribosome Assembly Factors Resolves Flexible RNA Regions within the Nascent Pre-Ribosomal RNA
Source: Noncoding RNA. 2022 Jan 9;8(1):1. doi: 10.3390/ncrna8010001 (PMC8788456; doi:10.3390/ncrna8010001)
Supplement: Supplementary file 1 [file ncrna-08-00001-s001.zip › Supplementary Tables.pdf]

## Supplementary Tables

**Table S1: Oligonucleotides used in this study.** Oligonucleotides used for different purposes are described. Database numbers, sequence and usage are indicated. Oligonucleotides marked with “#” belong to the Department of Biochemistry III at the University of Regensburg. Oligonucleotides marked with “o” belong to the collection of the UTP-Lab.

| Col. N.     | Name       | 5'-3'-sequence                                                                    | Purpose                                                                                               |
|-------------|------------|-----------------------------------------------------------------------------------|-------------------------------------------------------------------------------------------------------|
| <b>o54</b>  | Pwp2_S3    | GATTCCAGTGATGAAGAAGA<br>AAATGAGAAAGAGCTTCCTC<br>GTACGCTGCAGGTCGAC                 | Amplification of <i>HA-MNase::KANMX</i> cassette (o54-#3941)                                          |
| <b>o55</b>  | Utp12_S3   | GAGTAATAGTGCAAGGAAGA<br>GAGTTTTCGGGACCGTTATAC<br>GTACGCTGCAGGTCGAC                | Amplification of <i>HA-MNase::KANMX</i> cassette (o55-o56)                                            |
| <b>o56</b>  | Utp12_S2   | GGGCAGAGTAATGCCGGTATT<br>ATGTAGGATAATAGTTTAAAT<br>CGATGAATTCGAGCTCG               | Amplification of <i>HA-MNase::KANMX</i> cassette (o55-o56)                                            |
| <b>o57</b>  | Utp13_S3   | CATATTAGACTACGCGTAGT<br>GGAAATGGATAAGCTATTCCG<br>TACGCTGCAGGTCGAC                 | Amplification of <i>HA-MNase::KANMX</i> cassette (o57-o58)                                            |
| <b>o58</b>  | Utp13_S2   | GCCTTGCTTTTAAAGGCTCAA<br>TATCTTGGACTIONACTGCATCG<br>ATGAATTCGAGCTCG               | Amplification of <i>HA-MNase::KANMX</i> cassette (o57-o58)                                            |
| <b>o59</b>  | Utp18_S3   | CGAACAAGGTAAAGTGAGGC<br>TCTGGAAATTAAACCACTACC<br>GTACGCTGCAGGTCGAC                | Amplification of <i>HA-MNase::KANMX</i> cassette (o59-o60)                                            |
| <b>o60</b>  | Utp18_S2   | GTACATTGCTTTTAAATATCTA<br>AGTTTGTCTATAAATGGAAAT<br>ATCGATGAATTCGAGCTCG            | Amplification of <i>HA-MNase::KANMX</i> cassette (o59-o60)                                            |
| <b>o61</b>  | Utp6_S3    | CAGAAGATGATCCTAGGTAT<br>AAAATTCTAGATTTAATTATC<br>AGCAAACCTTCGTACGCTGCAG<br>GTCGAC | Amplification of <i>HA-MNase::KANMX</i> cassette (o61-o62)                                            |
| <b>o62</b>  | Utp6_S2    | CTGATATGTAATTGCATTTAT<br>AAAATGTACAGTACCGCATAT<br>CGATGAATTCGAGCTCG               | Amplification of <i>HA-MNase::KANMX</i> cassette (o61-o62)                                            |
| <b>o67</b>  | bA0        | CGCTGCTCACCAATGG                                                                  | hybridizes in the rDNA, 5'ETS before A0 site                                                          |
| <b>o169</b> | 2921-A0A1  | (DY682)CCCACCTATTCCCTCT<br>TGCTAG                                                 | Fluorescent oligonucleotide for primer extension. Hybridization site at 5'ETS between A0 and A1 sites |
| <b>o171</b> | 205-A1-18S | (DY682)CATGGCTTAATCTTTG<br>AGAC                                                   | Fluorescent oligonucleotide for primer extension. Hybridization site at 5' of 18S sequence            |
| <b>o172</b> | 206-D/A2   | (DY682)CGGTTTTAATTGTCCT<br>A                                                      | Fluorescent oligonucleotide for primer extension. Hybridization site at ITS1 between D and A2 sites   |
| <b>o173</b> | 207-A2/A3  | (DY682)TGTTACCTCTGGGCCC                                                           | Fluorescent oligonucleotide for primer extension. Hybridization                                       |

|              |                  |                                                                    |                                                                                                         |
|--------------|------------------|--------------------------------------------------------------------|---------------------------------------------------------------------------------------------------------|
|              |                  |                                                                    | site at ITS1 between A2 and A3 sites                                                                    |
| <b>o177</b>  | SnR17-Middle3468 | (DY682)CCGCTAAGGATTGCGGACCAAGC                                     | Fluorescent oligonucleotide for primer extension. Hybridization site at snR17A (U3 snoRNA)              |
| <b>o197</b>  | vA0(DY682)       | [DY682]CGCTGCTCACCAATGG                                            | Fluorescent oligonucleotide for primer extension. Hybridization site at 5'ETS before A0 site            |
| <b>o198</b>  | 5'18S_rev(DY682) | [DY682]AACGATAACTGATTATAAGGCC                                      | Fluorescent oligonucleotide for primer extension. Hybridization site at 5' of 18S sequence              |
| <b>o205</b>  | snr17a_END       | (DY682)TCAGACTGCCATTTGTACCC                                        | Fluorescent oligonucleotide for primer extension. Hybridization site at snR17A (U3 snoRNA) at the 3'end |
| <b>#206</b>  | o3-D/A2          | CGGTTTTAATTGTCCTA                                                  | hybridizes in the rDNA, ITS1 between D and A2 sites                                                     |
| <b>#207</b>  | o4-A2/A3         | TGTTACCTCTGGGCCC                                                   | hybridizes in the rDNA, ITS1 between A2 and A3 sites                                                    |
| <b>#2921</b> | A0A1-sonde       | CCCACCTATTCCCTCTTGCTAG                                             | hybridizes in the rDNA, 5'ETS between A0 and A1 sites                                                   |
| <b>#3468</b> | SnR17-Middle     | CCGCTAAGGATTGCGGACCAAGC                                            | hybridizes in the U3 snoRNA                                                                             |
| <b>#3469</b> | SnR30-Middle     | CAGAGGAGAAGTCAGGAGCTGC                                             | hybridizes in the snR30 snoRNA                                                                          |
| <b>#3692</b> | NAN1-S3-fw       | GTGCAAATGGATACATTTTTTGATCGTGATGAAAGTATTACACGTACGCTGCAGGTCGAC       | Amplification of <i>HA-MNase::KANMX</i> cassette (#3692-#3693)                                          |
| <b>#3693</b> | NAN1-S2-rev      | ATACCTTTATATCTATTTTGGATATCCAATGGAAGAACCCTAAGATCGATGAATTCGAGCTCG    | Amplification of <i>HA-MNase::KANMX</i> cassette (#3692-#3693)                                          |
| <b>#3694</b> | UTP4-S3-fw       | TTTCACTCCAAACAAAAGGCGTTTATTCAACCAAAGTTAGTGTTCGTACGCTGCAGGTCGAC     | Amplification of <i>HA-MNase::KANMX</i> cassette (#3694-#3695)                                          |
| <b>#3695</b> | UTP4-S2-rev      | TTTAAATAGCATCTCTCTATTC TTCGGTATGTTGACTTAAATTAAATCGATGAATTCGAGCTCG  | Amplification of <i>HA-MNase::KANMX</i> cassette (#3694-#3695)                                          |
| <b>#3696</b> | UTP5-S3-fw       | AGCGACGGCGAGGAGGAAGCCGATATAGTGACGTTGAGATGGAACGTACGCTGCAGGTCGAC     | Amplification of <i>HA-MNase::KANMX</i> and <i>TAP::URA3</i> cassettes (#3696-#3697)                    |
| <b>#3697</b> | UTP5-S2-rev      | ATTTTTGTATTCTGATGCGTGAAAGCATTTTATGCATGATATCTATCGATGAATTCGAGCTCG    | Amplification of <i>HA-MNase::KANMX</i> and <i>TAP::URA3</i> cassettes (#3696-#3697)                    |
| <b>#3698</b> | UTP8-S3-fw       | CAGAAGCGAGCCTTACCCAC TTACACCATGGAATACTTGGA CATTTCGTACGCTGCAGGTCGAC | Amplification of <i>HA-MNase::KANMX</i> cassette (#3698-#3699)                                          |

|       |              |                                                                             |                                                                    |
|-------|--------------|-----------------------------------------------------------------------------|--------------------------------------------------------------------|
| #3699 | UTP8-S2-rev  | TTTCTATATAGGTATTATACA<br>ATACAATCAAATTCATTGCAT<br>ACATCGATGAATTCGAGCTCG     | Amplification of <i>HA-MNase::KANMX</i> cassette (#3698-<br>#3699) |
| #3700 | UTP9-S3-fw   | AATGGAGAAAGTGACGAATT<br>TGTCGACGCATCGGAATACA<br>AAGATCGTACGCTGCAGGTC<br>GAC | Amplification of <i>HA-MNase::KANMX</i> cassette (#3700-<br>#3701) |
| #3701 | UTP9-S2-rev  | TGAAACTTTTCTTTGTATATAC<br>TTAAATATATTTAAAATGCTT<br>GAATCGATGAATTCGAGCTCG    | Amplification of <i>HA-MNase::KANMX</i> cassette (#3700-<br>#3701) |
| #3702 | UTP10-S3-fw  | GTTGTTGAAAACGTTTTAGGG<br>GAACCTTTTGATAGGTATTTA<br>GATCGTACGCTGCAGGTCGAC     | Amplification of <i>HA-MNase::KANMX</i> cassette (#3702-<br>#3703) |
| #3703 | UTP10-S2-rev | GTGTTTTACTTTACAAAAATTT<br>ACATAATACTTCACCTTTTTTT<br>TATCGATGAATTCGAGCTCG    | Amplification of <i>HA-MNase::KANMX</i> cassette (#3702-<br>#3703) |
| #3704 | UTP15-S3-fw  | AAAGAAGCTCAAAGAATTGA<br>AGGTATGCTTCAACTTTTAAC<br>GAGTCGTACGCTGCAGGTCGA<br>C | Amplification of <i>HA-MNase::KANMX</i> cassette (#3704-<br>#3705) |
| #3705 | UTP15-S2-rev | ATCTATAAAATAGATACAAAT<br>TAAATCTATATGCTAATATT<br>TCCATCGATGAATTCGAGCTC<br>G | Amplification of <i>HA-MNase::KANMX</i> cassette (#3704-<br>#3705) |
| #3883 | S3_TAP       | CAGCTGAAGCTTCGTACGCTG<br>CAGGTCGACATGGAAAAGAG<br>AAGATGGAAAAAG              | Amplification of <i>TAP::URA3</i><br>(#3883-#3884)                 |
| #3884 | S2_pBS       | GGATCTGATATCATCGATGAA<br>TTCGAGCTCGATACGACTCAC<br>TATAGGGCG                 | Amplification of <i>TAP::URA3</i><br>(#3883-#3884)                 |
| #3941 | Pwp2_S2Ct    | ATGTGAATGTGCATAAATAGA<br>GGACAGTGAATATTTTCAAT<br>CGATGAATTCGAGCTCG          | Amplification of <i>HA-MNase::KANMX</i> cassette (o54-<br>#3941)   |

**Table S2: Plasmids used in this study.** Database numbers, name of the plasmid, contained markers for selection and the cloning procedure are indicated. Plasmids marked with “#” belong to the Department of Biochemistry III at the University of Regensburg. Plasmids marked with “p” belong to the collection of the UTP-Lab.

| #     | Name          | Gene                              | Marker | Source  | Cloning procedure                                      |
|-------|---------------|-----------------------------------|--------|---------|--------------------------------------------------------|
| p96   | pYM-TAP::URA3 | <i>TAP::URA3</i> cassette         | Amp    | UTP-Lab | URA3 from pBS1539 cloned in pYM15 (Janke et al., 2004) |
| #97   | pBS1539       | <i>TAP::URA3</i> cassette         | Amp    | BCIII   | [25]                                                   |
| #643  | pKM9          | <i>MNase-3xHA::KANMX</i> cassette | Amp    | BCIII   |                                                        |
| #2116 | K2116         | <i>LongHelix-MNase</i>            | Amp    | BCIII   | Gene synthesis by Entelechon                           |
| #2132 | K2132         | <i>MNase-3xHA::KANMX</i> cassette | Amp    | BCIII   | This work. See Methods                                 |

**Table S3: Yeast strains used in this study.** Database numbers, name of the strain, genotype, and source are indicated. Strains labeled with “#” belong to the Department of Biochemistry III at the University of Regensburg. Strains labeled with “Y” belong to the collection of the UTP-Lab.

| #     | Name     | Genotype                                                                                                                                                     | Source        |
|-------|----------|--------------------------------------------------------------------------------------------------------------------------------------------------------------|---------------|
| #206  | BY4741   | MAT a; <i>his3-1; leu2-0; met15-0; ura3-0</i>                                                                                                                | Biochemie III |
| #207  | BY4742   | MAT a; <i>his3-1; leu2-0; ura3-0; lys2-0</i>                                                                                                                 | Biochemie III |
| #2583 | Y2583    | MAT a; <i>his3-1; leu2-0; met15-0; ura3-0;</i><br>YML063w::KANMX4; YLR441C::HIS3;<br>YDR324C::UTP4-TAP::klURA3; YEp-<br>P <sub>RPS28</sub> ::2xHA-MNase-RPS1 | Biochemie III |
| #2864 | Y2864    | MAT $\alpha$ ; <i>his3-1; leu2-0; lys2-0; ura3-0;</i><br>YCR057C::PWP2-TAP::URA3;<br>YDR324C::KANMX::MNase-3xHA-UTP4                                         | This study    |
| #2866 | Y2866    | MAT $\alpha$ ; <i>his3-1; leu2-0; lys2-0; ura3-0;</i><br>YCR057C::PWP2-TAP::URA3;<br>YDR398W::KANMX::MNase-3xHA-UTP5                                         | This study    |
| #2868 | Y2868    | MAT $\alpha$ ; <i>his3-1; leu2-0; lys2-0; ura3-0;</i><br>YCR057C::PWP2-TAP::URA3;<br>YGR128C::KANMX::MNase-3xHA-UTP8                                         | This study    |
| #2870 | Y2870    | MAT $\alpha$ ; <i>his3-1; leu2-0; lys2-0; ura3-0;</i><br>YCR057C::PWP2-TAP::URA3;<br>YHR196W::KANMX::MNase-3xHA-UTP9                                         | This study    |
| #2873 | Y2873    | MAT $\alpha$ ; <i>his3-1; leu2-0; lys2-0; ura3-0; PWP2-</i><br>TAP::URA3; YJL109C::KANMX::MNase-<br>3xHA-UTP10                                               | This study    |
| #2874 | Y2874    | MAT $\alpha$ ; <i>his3-1; leu2-0; lys2-0; ura3-0;</i><br>YCR057C::PWP2-TAP::URA3;<br>YMR093W::KANMX::MNase-3xHA-UTP15                                        | This study    |
| #2976 | Y2976    | MAT $\alpha$ ; <i>his3-1; leu2-0; lys2-0; ura3-0;</i><br>YCR057C::PWP2-TAP-URA3;<br>YPL126W::KANMX::MNase-3xHA-NAN1                                          | This study    |
| Y319  | YFAT1-1a | MATa; <i>his3-1; leu2-0; met15-0; ura3-0;</i><br>YCR057C::KANMX::MNase-3xHA-PWP2                                                                             | This study    |
| Y321  | YFAT2-1a | MATa; <i>his3-1; leu2-0; met15-0; ura3-0;</i><br>YLR409C::KANMX::MNase-3xHA-UTP21                                                                            | This study    |
| Y323  | YFAT3-1a | MATa; <i>his3-1; leu2-0; met15-0; ura3-0;</i><br>YLR129W::KANMX::MNase-3xHA-UTP12                                                                            | This study    |
| Y325  | YFAT4-1a | MATa; <i>his3-1; leu2-0; met15-0; ura3-0;</i><br>YLR222C::KANMX::MNase-3xHA-UTP13                                                                            | This study    |
| Y327  | YFAT5-1a | MATa; <i>his3-1; leu2-0; met15-0; ura3-0;</i><br>YDR449C::KANMX::MNase-3xHA-UTP6                                                                             | This study    |
| Y329  | YFAT6-1a | MATa; <i>his3-1; leu2-0; met15-0; ura3-0;</i><br>YJL069C::KANMX::MNase-3xHA-UTP18                                                                            | This study    |

|             |          |                                                                                                                             |            |
|-------------|----------|-----------------------------------------------------------------------------------------------------------------------------|------------|
| <b>Y368</b> | YMCT2-1a | MATa; <i>his3-1; leu2-0; met15-0; ura3-0;</i><br><i>YDR398W::UTP5-TAP::URA3;</i><br><i>YLR129W::KANMX::MNase-3xHA-UTP12</i> | This study |
| <b>Y370</b> | YMCT3-1a | MATa; <i>his3-1; leu2-0; met15-0; ura3-0;</i><br><i>YDR398W::UTP5-TAP::URA3;</i><br><i>YLR222C::KANMX::MNase-3xHA-UTP13</i> | This study |

**Table S4: Antibodies used in this study.**

| <b>Antibody</b>                            | <b>Origin</b> | <b>Dilution</b> | <b>Origin</b> |
|--------------------------------------------|---------------|-----------------|---------------|
| <b>Anti-PAP (peroxidase conjugated)</b>    | rabbit        | 1:5000          | GenScript     |
| <b>Anti-Utp18</b>                          | rabbit        | 1:1000          | Agro-Bio      |
| <b>Anti HA</b>                             | rat (3F10)    | 1:5000          | Roche         |
| <b>Anti-rat (peroxidase conjugated)</b>    | goat          | 1:5000          | Dianova       |
| <b>Anti-rabbit (peroxidase conjugated)</b> | goat          | 1:5000          | Dianova       |
